# Supplementary material
Source: PubMed Central journal article supplement (PMC1356306)
Supplement: 7600866s2.pdf [file 7600866s2.pdf]

**Supplementary Table I. Wet weight, protein concentration and total protein content of the left IBAT lobe**

|                                        | 25 °C        |              | 4 °C         |              |
|----------------------------------------|--------------|--------------|--------------|--------------|
|                                        | Control      | hSOD2/+      | Control      | hSOD2/+      |
| <b>Wet weight, left IBAT lobe (mg)</b> | 33.3 ± 4.3   | 35.4 ± 3.1   | 61.5 ± 2.7   | 66.4 ± 1.2   |
| <b>Protein</b>                         |              |              |              |              |
| mg/mg wet tissue weight                | 0.108 ±0.005 | 0.102 ±0.003 | 0.138 ±0.005 | 0.138 ±0.004 |
| mg/left IBAT lobe                      | 3.6 ± 0.3    | 3.6 ± 0.2    | 8.6 ± 0.2    | 8.7 ± 0.3    |

IBAT refers to the Interscapular Brown Adipose Tissue. The values were obtained from wild-type and PAC662D1 females.
